# Supplementary material
Source: PubMed Central journal article supplement (PMC3387080)
Supplement: 1201398109_pnas.201201398SI.pdf [file 1201398109_pnas.201201398SI.pdf]

# Supporting Information

Thompson et al. 10.1073/pnas.1201398109

## SI Methods

**Generation of pET YtgR and YtgCR Expression Vectors.** The sequence coding for the final 147 amino acids of CT069 was amplified from *C. trachomatis* serovar D genomic DNA using primers CT1003 and CT1004, which engineered an additional CACC onto the 5' end of the PCR product for directional insertion into the pET151-D/TOPO vector (Invitrogen) to make pET-YtgR. To generate pET-YtgCR, the full-length *ct069* coding sequence was amplified from pBAD-YtgCR (see below) using primers CT1101 AND CT1102, which engineered an additional 3' NcoI restriction site. The NcoI restriction site was used to ligate the *ct069* PCR product to a double-stranded oligonucleotide coding for the FLAG epitope, which was generated through the annealing of two custom-synthesized oligonucleotides (CT1033 and CT1034). The ligated sequence was amplified with primers CT1103 and CT1104, which added a 5' CACC for directional insertion into the pET151-D/TOPO vector.

To generate pBAD-YtgCR, the full-length *ct069* coding sequence was amplified from genomic DNA using primers CT1036 and CT1035, which added an additional 5' KpnI restriction site. This site was used to ligate a FLAG epitope coding sequence, which was generated through the annealing of two custom synthesized oligonucleotides (CT1033 and CT1034). PCR amplification of the ligated sequence with primers CT1037 and CT1035 generated a PCR product, to which 3' A-overhangs were added with the addition of Taq polymerase and ATP for 5 min at 72 °C. The PCR product was ligated into the pBAD-TOPO/TA expression vector.

**Generation of the pCCT Reporter Plasmids.** A nucleotide region of 2,100 bp containing a tetracycline resistance cassette (TetR) and a p15A origin of replication sequence was amplified from pACYC184 using primers CT1018 and CT1019, which incorporated a BglII and XhoI restriction endonuclease sites on the 5' and 3' flanks, respectively. A nucleotide region of 4,878 bp was amplified from the pBAD-TOPO/LacZ/V5-His control expression vector using primers CT1020 and CT1021. The resultant PCR product contained an *araC* gene, an arabinose inducible promoter ( $P_{BAD}$ ), a sequence coding for  $\beta$ -galactosidase tagged C-terminally with V5 and polyhistidine epitopes, *rrnB* T1 and T2 transcriptional termination sites, and incorporated XhoI and BglII restriction endonuclease sites at the 5' and 3' flanks, respectively. The two PCR products were digested with XhoI and BglII simultaneously, before resolution on 0.7% Tris-acetate-EDTA (TAE) agarose gel and purification. Digested products were circularized using T4 ligase treatment overnight at 16 °C to create pCCT100. A KpnI restriction site was inserted into the flanking region of  $P_{BAD}$  using inverse PCR with primers CT1022 and CT1023 within the framework of the Site-directed Mutagenesis kit (Invitrogen), to generate pCCT101. A sequence containing the YtgR operator sequence was PCR amplified from *C. trachomatis* serovar D genomic DNA with primers CT1024 and CT1025, which generated KpnI restriction sites on both flanks. Vector and the PCR product were digested with KpnI and ligated together to create pCCT102. Colony PCR verified insert direction, and plasmids were verified by sequencing (GATC).

**Expression and Purification of Recombinant YtgR.** Overnight cultures of BL21\* (DE3) *E. coli* harboring pET-YtgR were subcultured into 200 mL of LB plus carbenicillin, grown to an  $OD_{600} = 0.5$  and supplemented with Isopropyl  $\beta$ -D-1-thiogalactopyranoside (IPTG) to a final concentration of 0.75 mM for 5 h before

sedimentation by centrifugation ( $10,000 \times g$  for 30 min) and storage at  $-80$  °C.

After determining recombinant YtgR remained predominantly insoluble, we used a purification process previously described for the purification of other insoluble transcription factors (1, 2), with slight modifications. Pellets of *E. coli* harboring pET-YtgR were thawed on ice, and all subsequent steps were carried out at 4 °C or on ice. The thawed pellet was resuspended in 20 mL of Buffer A [50 mM Tris HCl, 50 mM NaCl, 0.1 mM DTT, 5% glycerol, 0.1 mM EDTA, 2% (wt/vol) deoxycholate (pH 7.0)] supplemented with 0.2 mg/mL lysozyme for 30 min. The bacterial suspension was then sonicated and centrifuged at  $12,000 \times g$  for 30 min. The insoluble pellet was washed twice with buffer A (without lysozyme), with each wash lasting 1 h with gentle agitation. After the second wash step, the insoluble fraction was sedimented by centrifugation at  $16,000 \times g$  for 30 min. The YtgR recombinant was liberated from the insoluble fraction by resuspending the pellet in buffer B [50 mM Tris HCl, 50 mM NaCl, 0.1 mM DTT, 5% glycerol, 0.25% (wt/vol) sarkosyl (pH 7.0)] for 1 h with gentle agitation. The soluble fraction was collected after centrifugation ( $16,000 \times g$ ), and another round of protein liberation was performed. Soluble fractions were pooled and recombinant YtgR was purified using the Ni-NTA kit (QIAGEN) as described by the instructions of the manufacturer for non-denaturing purification. Samples from each step in this process were analyzed by SDS/PAGE. Elutions containing a single product by Coomassie staining were pooled, and dialyzed into a buffer suitable for low-temperature storage (50 mM Tris HCl, 50 mM NaCl, 0.1 mM DTT, 5% glycerol, pH = 7.0). Half of the sample was incubated with Chelex-100 resin (Bio-Rad) for 2 h at 4 °C. Non-Chelex-treated (referred to as purified YtgR) and Chelex treated (referred to as apo-YtgR) were aliquoted, flash frozen, and stored at  $-80$  °C. Protein concentrations were determined using the BCA Protein Assay Kit (Pierce).

**Generation of Biotin-Tagged DNA Oligonucleotides.** The region upstream of the *ytgA* coding sequence, containing the putative promoter elements and YtgR operator sequence was amplified from genomic DNA purified from *C. trachomatis* Serovar D EBs using primers CT1011 and CT1012 (Dataset S1). Primer CT1011 was engineered with a 5' Biotin-tag (Custom ordered from Invitrogen). A single amplified PCR product was ethanol precipitated, resuspended in nuclease free water and stored at  $-20$  °C.

**Dot-Blot Assay.** Whatman Optitron BA-5 83 0.2  $\mu$ m NC (Millipore) membrane was soaked in 0.4 M KOH for 5 min, before  $3 \times 5$ -min washes with distilled deionized H<sub>2</sub>O. The membrane was equilibrated in wash buffer [20 mM Tris-HCl (pH 8.0), 50 mM KCl, 5% glycerol, 0.5 mM DTT, 2 mM MgCl<sub>2</sub>, 150  $\mu$ M ascorbic acid] for at least 15 min at 4 °C. The apo-YtgR was diluted into 38- $\mu$ L reaction buffer (wash buffer plus 150  $\mu$ M FeSO<sub>4</sub> or MnCl<sub>2</sub>) and allowed to equilibrate for 15 min at room temperature. A 2- $\mu$ L volume of a 20 nM concentration of the biotinylated-DNA sequence was added to the reaction, which was then incubated at 30 °C for 30 min. The NC membrane was placed on top of filter paper within the dot-blot hybridization manifold (DHM-48; Fischer), and wells were flushed with wash buffer two times. Without application of the vacuum, samples were added to respective wells. The vacuum was then applied and each used well was washed two more times with wash buffer. The apparatus was disassembled, and the NC membrane was blocked in TBS plus 0.1% Tween-20 containing 3% BSA

(Sigma). The NC blot was probed with HRP-conjugated streptavidin in the same blocking buffer at a dilution of 1:20,000 for 1 h at room temperature. Biotinylated DNA retention to the NC blot was detected using the Immobilon HRP-substrate chemiluminescent detection kit (Millipore) and images were captured using the FUJI-3000 LAS imager at  $-30^{\circ}\text{C}$ . Dot-blot intensities were measured from a single image, using ImageJ software. Values were transformed by the average intensity of an unused well. Results displayed in Fig. 2A and B are one representative experiment of three showing the same trend.

**Biolayer Interferometry.** Biolayer interferometry kinetic studies of DNA:protein interactions were performed using the Octet QKe (ForteBio). Target DNA was PCR amplified with a 5' biotinylated oligo, as described above. A 25 nM final concentration of purified recombinant YtgR was equilibrated in Kinetics Buffer (KB) (ForteBio) supplemented with the various metal solutions ( $\text{FeSO}_4$ ,  $\text{MnCl}_2$ ,  $\text{ZnCl}_2$ ,  $\text{CuCl}_2$ , or  $\text{CoCl}_2$ ) at a final concentration of 200  $\mu\text{M}$  for  $\sim 20$  min. During this time, the biotinylated PCR product was loaded onto the streptavidin-coated sensors for 15 min, which was ample time to achieve tip saturation. After washing in KB) which contains BSA to negate nonspecific protein binding, sensors were incubated in the recombinant YtgR<sup>+/-</sup> various metal supplements. The change in internally reflected light attributable to DNA:protein interactions was collected in real time for 10 min, at which point the tips were washed once in KB and incubated for an additional 20 min in KB to collect dissociation data. Binding kinetics were calculated based on the change in the reflected light over time (measured as a change in distance between a reference reflection point and the bound material on the tip) using the software provided with the Octet QKe.

**Western Blots.** *C. trachomatis* D/UW-3/CX was obtained originally from Ted Hacksadt (Rocky Mountain Laboratory, National Institute of Allergy and Infectious Diseases, Hamilton, MT), and propagated/purified in HeLa cells as described (3). Infected HeLa cell monolayers (multiplicity of infection of 2) were grown for 1, 6, or 24 h postinvasion before being lysed into RIPA buffer. Samples were mixed with 5 $\times$  SDS sample buffer and resolved on a 12% TGS/polyacrylamide gel. Protein transfer and immunoblotting were performed with standard methods, using rabbit polyclonal antisera, raised against the full-length CT069, which was a kind gift of Guangming Zhong (University of Texas Health Sciences Center, San Antonio, TX).

Top10 *E. coli* harboring the pBAD-YtgCR expression vector, or the pBAD-empty vector, were grown overnight in 5 mL of LB broth containing 0.2% (wt/vol) D-glucose and 50  $\mu\text{g}/\text{mL}$  carbeni-

cillin. The next day, 1 mL of the cultures were pelleted and rinsed with LB broth twice, to remove traces of D-glucose. Each bacterial culture was then subcultured to an  $\text{OD}_{600}$  of 0.1 in LB supplemented with carbenicillin, in triplicate. After 2 h, cultures were either induced for expression of the YtgCR [addition of 0.002% (wt/vol) L-arabinose], repressed for expression [addition of 0.2% (wt/vol) D-glucose], or were left unchanged (uninduced). After 4 h of additional growth, 0.1 OD units were pelleted and resuspended in 100  $\mu\text{L}$  of 1 $\times$  SDS sample buffer. Samples were boiled for 10 min at  $100^{\circ}\text{C}$  and resolved by SDS/PAGE. Proteins were transferred, immunoblotted, and detected using standard techniques, in this case using a 1:2,000 dilution of an anti-V5 epitope monoclonal antibody that was conjugated to HRP (AbCam). To determine the affinity of the CT069 antisera, *E. coli* harboring pBAD-YtgCR were subcultured as before and supplemented with 0.02% (wt/vol) L-arabinose (induced) or 0.2% (wt/vol) D-glucose (repressed) for 4 h.

**Reporter Gene Expression Assay.** Chemically competent BL21\* *E. coli* were initially transformed with pCCT101 or pCCT102 and plated onto LB agar containing tetracycline (15  $\mu\text{g}/\text{mL}$ ). Selected colonies were verified for the presence of the reporter plasmid, grown in selective LB broth culture, made electrocompetent, transformed with pET151-EV, pET-YtgR, or pET-YtgCR by electroporation and were plated onto LB agar containing tetracycline (15  $\mu\text{g}/\text{mL}$ ), carbenicillin (50  $\mu\text{g}/\text{mL}$ ), and X-gal (40  $\mu\text{g}/\text{mL}$ ). Single transformants of either set of plasmids did not grow on double selective media. Colonies of cotransformants were grown overnight in double selective LB broth containing D-glucose (0.2% wt/vol) at  $37^{\circ}\text{C}$  and 200 rpm. The next day, cultures were pelleted and resuspended in LB broth (to remove D-glucose) and subcultured to an  $\text{OD}_{600}$  of 0.1 in 5 mL of double-selective LB broth supplemented with 5  $\mu\text{L}$  of a 50 mM  $\text{FeSO}_4$  solution. Samples were grown at  $37^{\circ}\text{C}$  at 200 rpm. After 1 h, cultures were supplemented with 200 mM IPTG, to induce expression of the pET vectors. Following an additional hour of induction, L-arabinose was supplemented to a final concentration of 0.2% (wt/vol) to abrogate AraC repression of the  $P_{\text{BAD}}$  promoter. Samples were collected 2 h after L-arabinose supplementation, and LacZ expression was measured via the Miller assay, as described (4). The experiment was performed three times independently, with each trial including the full complement of cotransformant samples. Interexperimental error was corrected by transforming the values of each trial, such that the mean of all samples within each batch were identical. The mean MU of each sample from the three batch-corrected experiments is shown. Error bars represent 1 SD from the mean.

1. Nguyen LH, Jensen DB, Burgess RR (1993) Overproduction and purification of sigma 32, the Escherichia coli heat shock transcription factor. *Protein Expr Purif* 4:425–433.  
2. Posey JE, Hardham JM, Norris SJ, Gherardini FC (1999) Characterization of a manganese-dependent regulatory protein, TroR, from Treponema pallidum. *Proc Natl Acad Sci USA* 96:10887–10892.

3. Caldwell HD, Kromhout J, Schachter J (1981) Purification and partial characterization of the major outer membrane protein of Chlamydia trachomatis. *Infect Immun* 31: 1161–1176.  
4. Miller JH (1972) *Experiments in Molecular Genetics* (Cold Spring Harbor Laboratory Press, Cold Spring Harbor, NY).





**Table S2. Oligonucleotide primers used in this study**

| Primer ID | Sequence (5' to 3')                               |
|-----------|---------------------------------------------------|
| CT1003    | CACCATGCATCTATTGAAAATCTTTGGTATTTAC                |
| CT1004    | CTAGCAACCATCCGACTTCCTTG                           |
| CT1018    | CCTCCTCTCGAGGCGCATTACAGTTCTCCGC                   |
| CT1019    | CCTCCTAGATCTCGGAGATTTCTGGAAGATGCCA                |
| CT1020    | TATAAGATCTCCGGCGGATTTGCCTACTCAGGAG                |
| CT1021    | ATATCTCGAGGCGAAGGCGAAGCGGCATG                     |
| CT1022    | ACGGGTATGGAGAAACAGTAGAGAGTTGCC                    |
| CT1023    | TACTGTTTCTCCATACCCGTGGTACCTTTTGGGCTAG             |
| CT1024    | TAATGGTACCAGATAATCGATACGGGGACATAC                 |
| CT1025    | ATATGGTACCGAATAGCTCCTTAGTGGGTAG                   |
| CT1033    | TAATCCATGGACTACAAGGACGATGACAAGGGTACCTAAT          |
| CT1034    | ATTAGGTACCCTTGTCATCGTCCTTGTAGTCCATGGATTA          |
| CT1035    | GCAACCATCCGACTTCCTTGTTCCG                         |
| CT1036    | ATATGGTACCCTGAGTTGTATATTTTCAGGACACTATCTTTCTATCCAG |
| CT1037    | CCATGGACTACAAGGACGATGACAAGGG                      |
| CT1101    | ATGCTGAGTTGTATATTTTCAGGACACTATC                   |
| CT1102    | ATACCATGGCGCAACCATCCGACTTCCTTGTT                  |
| CT1103    | CACCATGCTGAGTTGTATATTTTCAGGACACTATC               |
| CT1104    | CTAGGTACCCTTGCATCGTCCT                            |

## Other Supporting Information Files

[Dataset S1 \(XLSX\)](#)
